# Supplementary material for: 1H NMR Urinary Metabolomic Analysis in Older Adults after Hip Fracture Surgery May Provide Valuable Information for Patient Profiling—A Preliminary Investigation
Source: MDPI journal article supplement (doi:10.3390/metabo12080744), 2022-08-12
Supplement: s1 [file s1]

**Figure S1.** Overall PCA for all urine samples (a) score plot; (b) loading plot and (c) contribution plot

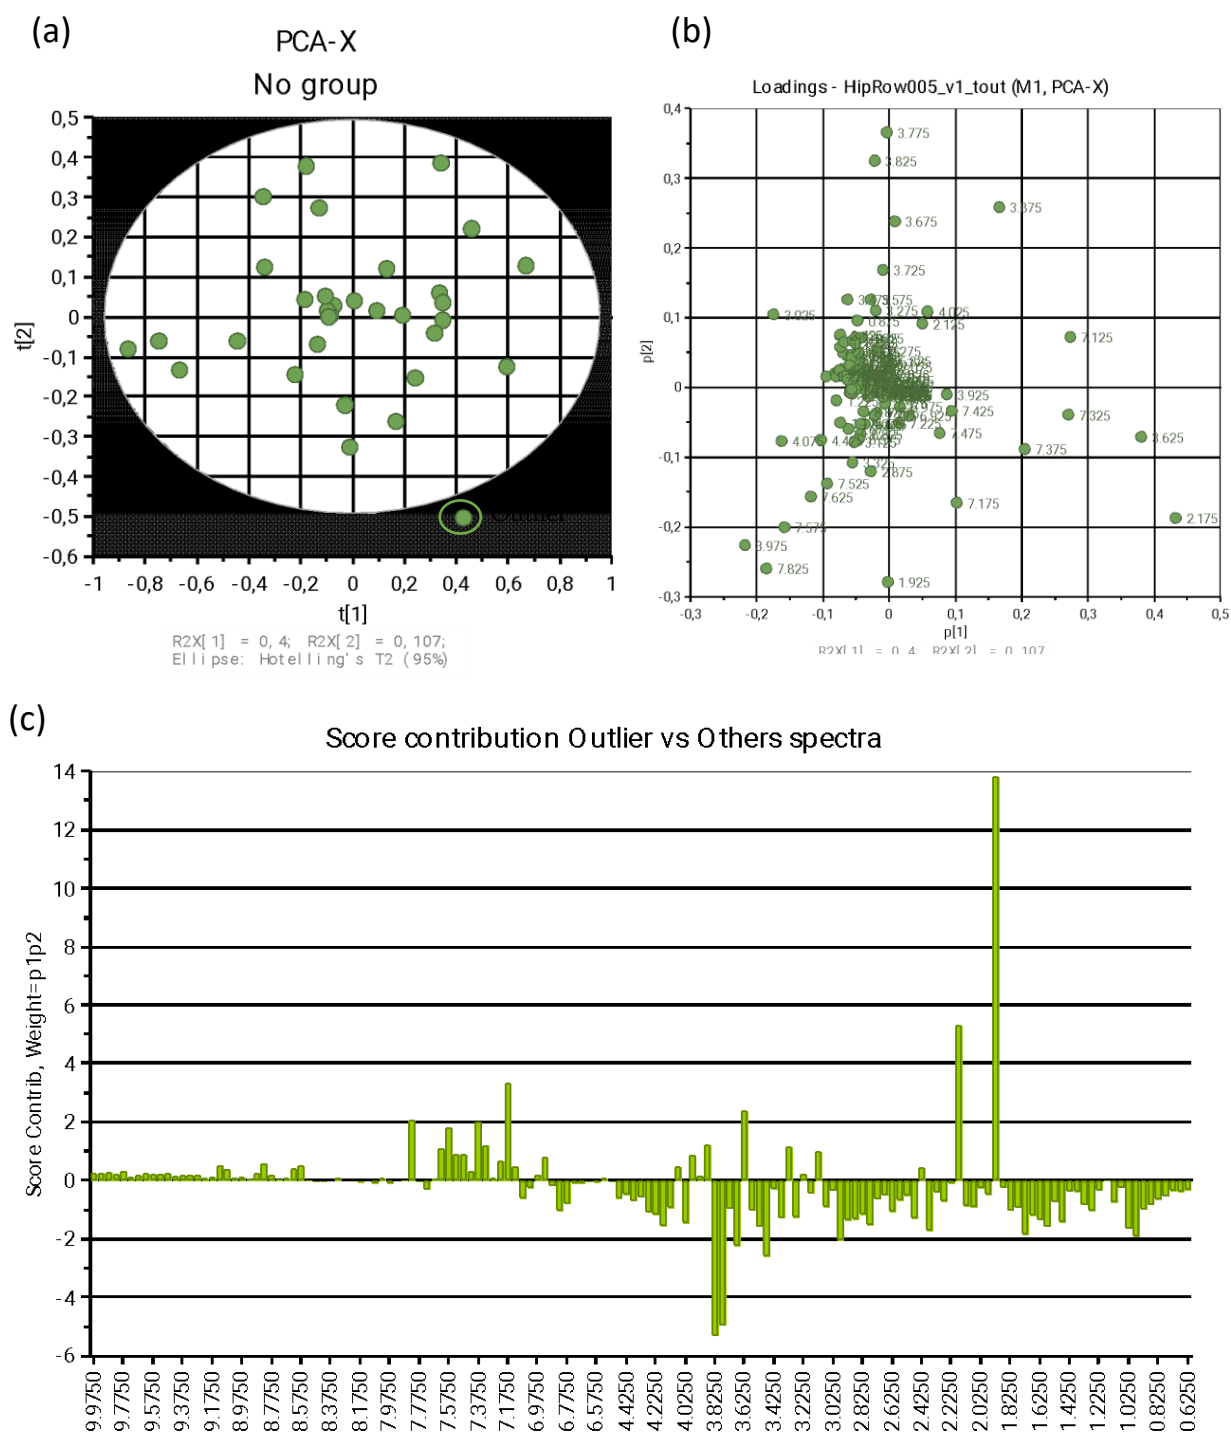

**Valine**  
 $p = 0.0487$

**Creatinine**  
 $p = 0.0371$

**Citrate 1**  
 $p = 0.0032$

**Citrate 2**  
 $p = 0.0122$

Figure 1 consists of five dot plots arranged horizontally, each representing a different urinary metabolite: Urea, Creatinine, Formate, Hippuric acid, and Methylguanidine. Each plot compares the distribution of concentrations in Women and Men. The y-axis for each plot represents the concentration of the metabolite. Individual data points are shown as black dots. A horizontal line indicates the mean, and vertical error bars represent the standard deviation. The p-value for each comparison is displayed above the plot.

| Metabolite      | Y-axis Range | Women Mean (approx.) | Men Mean (approx.) | p-value |
|-----------------|--------------|----------------------|--------------------|---------|
| Urea            | 0 - 2000     | ~800                 | ~1200              | 0.0027  |
| Creatinine      | 0 - 600      | ~150                 | ~220               | 0.0269  |
| Formate         | 0 - 5        | ~1.8                 | ~3.0               | 0.0007  |
| Hippuric acid   | 0 - 25       | ~4.0                 | ~9.5               | 0.0136  |
| Methylguanidine | 0 - 8        | ~1.5                 | ~3.5               | 0.0055  |

|                |                |                  |                |                |                |                |                |                   |                |                |                |                |  |
|----------------|----------------|------------------|----------------|----------------|----------------|----------------|----------------|-------------------|----------------|----------------|----------------|----------------|--|
| A06AD11        | B01AA03        | M02AC            |                |                |                |                |                |                   |                |                |                |                |  |
| A02BC02        | A03FA01        | A04AA01          | A12AX          |                | B01AB05        | B03AA01        | H02AB02        | nutritional drink | <b>N02AA05</b> | <b>N02AA05</b> | <b>N02AA55</b> | <b>N02BE01</b> |  |
| A12AX          | J01MA12        | R05CB15          | R05FA02        |                |                |                |                |                   |                |                |                |                |  |
| A06AD65        | A12AX          | C01DA02          | D07BA04        | <b>N02AJ06</b> | <b>N05CH01</b> | S01XA20        | B03AA01        | M05BA08           | <b>N02BE01</b> |                |                |                |  |
| A02BC02        | A12AX          | B01AB05          | B03AA01        | C09CA01        | M01AE01        | <b>N02AA05</b> | <b>N02AA05</b> | <b>N02AA05</b>    | <b>N02AA55</b> | <b>N02BE01</b> | <b>N02BE01</b> | <b>N02BE01</b> |  |
| B01AB05        | C08CA01        | J01DB01          | J01DC02        | <b>N02AA05</b> | <b>N02AA05</b> | <b>N02AE01</b> | <b>N02BE01</b> |                   |                |                |                |                |  |
| A10AD05        | B01AB05        | C03CA01          | C03DA01        | <b>N01DB01</b> | <b>N02AA05</b> | <b>N02AA55</b> | <b>N02BE01</b> | <b>N02BE01</b>    | <b>N02BE01</b> | N05AH04        | N05AH04        | N05AH04        |  |
| B01AB05        | B03BB01        | G04BD12          | H02AB06        | <b>N02AA05</b> | <b>N02AA55</b> | <b>N02AE01</b> | <b>N02BE01</b> | R02AB30           | R05CB01        | R05CB15        | energy drink   |                |  |
| B01AB05        | A12AX          | B03AA01          | G04CB02        | J01DC02        | <b>N02AA05</b> | <b>N02AA55</b> | <b>N02BE01</b> | N05CH01           |                |                |                |                |  |
| A02BC03        | A10AB05        | A10AE04          | A10BA02        | A12AA04        | B01AB05        | C01DA08        | C08CA01        | C09CA06           | <b>N02AA05</b> | <b>N02BE01</b> |                |                |  |
| A02BC02        | A10AB05        | A12AX            | B03AA01        | C07AB07        | H02AB06        | <b>N02AA05</b> | <b>N02AA55</b> | <b>N02BE01</b>    | R03AC02        | R03AK07        |                |                |  |
| A04AA02        | multivitamin   | A12AX            | B01AB05        | C07AB02        | J01XE01        | M05BA08        | <b>N02AA05</b> | <b>N02BE01</b>    |                |                |                |                |  |
| A04AA01        | multivitamin   | B01AA03          | H02AB09        | G04BD12        | J01EA01        | M05BA08        | <b>N02AA05</b> | <b>N02AA05</b>    | <b>N02BE01</b> |                |                |                |  |
| A04AA02        | H02AB02        | J05AB11          | <b>N02AA05</b> | N05AD06        | <b>N02BE01</b> |                |                |                   |                |                |                |                |  |
| A02BC02        | A06AD65        | A12AX            | B01AA03        | C03CA01        | C07AB07        | C09CA01        | M05BA08        | C10AA07           | <b>N02AA55</b> | <b>N02AA05</b> |                |                |  |
| A02BC02        | A03FA01        | multivitamin     | A12AX          | B01AB05        | B03AA01        | M05BA08        | <b>N02AA05</b> | <b>N02AA55</b>    | <b>N02BE01</b> |                |                |                |  |
| A02BA02        | A06AC01        | A04AA01          | A06AD65        | B01AA03        | B01AB05        | C10AA05        | H02AB02        | C03CA01           | M05BA08        | <b>N02AA05</b> |                |                |  |
| A03DA02        | A04AA02        | A10AB05          | A10AE05        | A10BA02        | A10BH01        | d3 vitamin     | multivitamin   | A12AX             | B01AB05        | B03AA01        | C09AA04        |                |  |
| B01AA03        | A04AA02        | A12AX            | B03AA01        | C07AB02        | C08CA01        | M05BA08        | <b>N02AA05</b> | <b>N02AA55</b>    | <b>N02BE01</b> | <b>N02BE01</b> |                |                |  |
| A06AD65        | A12AX          | B01AA03          | B03AA07        | C07AB07        | C09CA01        | G04CB02        | multivitamin   | J01CR02           | <b>N02AA05</b> | <b>N02AA55</b> | <b>N02BE01</b> | <b>N02BE01</b> |  |
| M05BA04        | A12AX          | <b>N02AA55</b>   | N06AX11        | N05CD07        |                |                |                |                   |                |                |                |                |  |
| A02BC05        | A06AD11        | multivitamin     | A12AX          | B01AC30        | B03AA01        | B03BA03        | C01DA08        | C07AB02           | C08CA01        | M05BA08        | <b>N02BE01</b> |                |  |
| <b>N02AA55</b> | M05BA08        | N06AX11          | N05AD09        | <b>N02BE01</b> | <b>N02AA55</b> | <b>N02AA05</b> | H02AB02        | B03AA01           | A12AX          | A04AA02        |                |                |  |
| <b>N02AA55</b> | <b>N02AA05</b> |                  |                |                |                |                |                |                   |                |                |                |                |  |
| A06AD65        | multivitamin   | A12AX            | B01AF01        | B03AA01        | C07AB07        | G03CA03        | M05BA08        | <b>N02AA05</b>    | <b>N02AA55</b> | N05CH01        |                |                |  |
| B01AB05        |                |                  |                |                |                |                |                |                   |                |                |                |                |  |
| B01AB05        | B01ACD6        | C03DA01          | C07AB07        | CAD9AA05       | C10AA05        | M05BA04        | M05BX04        | <b>N02AA05</b>    | <b>N02AA55</b> |                |                | <b>N02BE01</b> |  |
| A12BA01        | J01CA08        | J01EA01          | <b>N02BE01</b> | N05BA01        | N05BA01        | N05CF01        |                |                   |                |                |                |                |  |
| A06AB08        | A06AD65        | multivitamin     | A12AX          | B01AB05        | B02AA02        | C03CA01        | J01DC02        | M05BA04           | <b>N02AA05</b> | <b>N02AA55</b> | <b>N02BE01</b> |                |  |
| multivitamin   | B01AB05        | N05BA01          | M01AB05        | A11DA01        | A04AA01        |                |                |                   |                |                |                |                |  |
| A06AD11        | A06AD15        | lactobacillus GG | multivitamin   | A12AA04        | B01AA03        | A12BA01        | B03BA03        | J01DC02           | <b>N02AA05</b> | <b>N02AA55</b> | <b>N02BE01</b> |                |  |
| B01AB05        | B03BB01        | L04AX03          | oxynorm        |                |                |                |                |                   |                |                |                |                |  |
| A02BC02        | multivitamin   | A12AA04          | A12BA01        | B01AE01        | multivitamin   | C01AA05        | C01DA08        | C07AB07           | <b>N02AA05</b> | <b>N02AA55</b> | <b>N02BE01</b> |                |  |

**Table S2** . List of diseases among all participants and according to frailty status. Data are expressed as number of patients and frequency (%).

| Diseases<br>(frequency (%))                      | All (n=33) | non-frail (n=5) | pre-fail (n=18) | frail (n=10) |
|--------------------------------------------------|------------|-----------------|-----------------|--------------|
| Hypertension                                     | 23 (70)    | 2 (40)          | 14 (78)         | 7 (70)       |
| Diabetes                                         | 7 (21)     | 1 (20)          | 4 (22)          | 2 (20)       |
| Cardiovascular diseases*                         | 31 (94)    | 5 (100)         | 17 (94)         | 9 (90)       |
| Musculoskeletal diseases**                       | 29 (88)    | 5 (100)         | 17 (94)         | 7 (70)       |
| Chronic urinary infection or other renal decease | 4 (12)     | 0 (0)           | 2 (11)          | 2 (20)       |
| Problems with voiding e.g.. incontinence         | 17 (52)    | 1 (20)          | 12 (67)         | 4 (40)       |
| Osteoporosis                                     | 7 (21)     | 0 (0)           | 4 (22)          | 3 (30)       |

\*including coronary hearth disease. angina pectoris. history of myocardial infarction. heart failure;

\*\*Musculoskeletal including arthritis. rheumatoid arthritis.

**Table S3.** Supplementary documents concerning the Variable Importance in Projection (VIP) score for each outcome.

| VIP for PLS-DA regarding mortality |                               |                                                         |
|------------------------------------|-------------------------------|---------------------------------------------------------|
| Primary ID (chemical shift)        | VIP                           | Targeted metabolites                                    |
| 3.27500033" "                      | 3.876950026                   |                                                         |
| <b>2.17500019" "</b>               | <b>3.56086993</b><br><b>2</b> | Paracetamol (Acetaminophen) + Acetaminophen glucuronide |
| <b>7.12500048" "</b>               | <b>2.99595999</b><br><b>7</b> | Acetaminophen derivatives                               |
| 4.07500029" "                      | 2.932940006                   |                                                         |
| 3.62500024" "                      | 2.917439938                   |                                                         |
| 2.87500024" "                      | 2.859430075                   |                                                         |
| <b>7.17500019" "</b>               | <b>2.73318004</b><br><b>6</b> | Acetaminophen derivatives                               |
| 4.02500010" "                      | 2.414190054                   |                                                         |
| 7.37500048" "                      | 2.206650019                   |                                                         |
| 7.32500029" "                      | 2.185909986                   |                                                         |
| 3.97500038" "                      | 2.166569948                   |                                                         |
| 3.02500033" "                      | 2.10048008                    |                                                         |
| <b>1.92500031" "</b>               | <b>1.85157001</b>             | Acetate                                                 |
| 7.82500029" "                      | 1.733360052                   |                                                         |
| 2.12500024" "                      | 1.541049957                   |                                                         |
| 7.57500029" "                      | 1.536720037                   |                                                         |
| 3.87500024" "                      | 1.351250052                   |                                                         |
| 3.22500038" "                      | 1.332299948                   |                                                         |
| 7.52500057" "                      | 1.330680013                   |                                                         |
| <b>2.72500038" "</b>               | <b>1.20430004</b><br><b>6</b> | Dimethylamine                                           |
| <b>7.62500048" "</b>               | <b>1.19855999</b><br><b>9</b> | Hippuric acid                                           |
| 1.87500024" "                      | 1.162320018                   |                                                         |
| 3.57500029" "                      | 1.149960041                   |                                                         |
| <b>2.22500038" "</b>               | <b>1.14151001</b>             | Acetone                                                 |
| 4.42500019" "                      | 1.111529946                   |                                                         |
| 3.77500033" "                      | 1.072299957                   |                                                         |
| 3.72500038" "                      | 1.05456996                    |                                                         |
| 3.07500029" "                      | 0.96401298                    |                                                         |
| 3.17500019" "                      | 0.955281973                   |                                                         |
| 8.22500038" "                      | 0.909794986                   |                                                         |
| 2.67500019" "                      | 0.898232996                   |                                                         |
| 1.22500026" "                      | 0.893936992                   |                                                         |
| 1.17500019" "                      | 0.809105992                   |                                                         |
| 3.92500019" "                      | 0.777442992                   |                                                         |
| 1.67500031" "                      | 0.766892016                   |                                                         |
| 3.12500024" "                      | 0.766375005                   |                                                         |

|                      |                               |               |
|----------------------|-------------------------------|---------------|
| 2.47500038" "        | 0.759234011                   |               |
| 7.42500019" "        | 0.743125975                   |               |
| 3.82500029" "        | 0.738216996                   |               |
| 8.82500076" "        | 0.727976978                   |               |
| 2.27500033" "        | 0.722187996                   |               |
| 2.57500029" "        | 0.71172303                    |               |
| 2.52500033" "        | 0.702306986                   |               |
| <b>1.32500029" "</b> | <b>0.69817298</b><br><b>7</b> | Lactate       |
| 7.47500038" "        | 0.687752008                   |               |
| 1.77500021" "        | 0.685276985                   |               |
| 3.32500029" "        | 0.678472996                   |               |
| 3.37500024" "        | 0.677133024                   |               |
| 4.12500048" "        | 0.675014973                   |               |
| 1.42500031" "        | 0.674727023                   |               |
| 2.37500024" "        | 0.664951026                   |               |
| 3.52500033" "        | 0.663039029                   |               |
| 1.37500024" "        | 0.641982019                   |               |
| <b>1.47500026" "</b> | <b>0.63547998</b><br><b>7</b> | Alanine       |
| 2.42500019" "        | 0.625910997                   |               |
| 3.42500019" "        | 0.62570399                    |               |
| 2.07500029" "        | 0.619328022                   |               |
| 1.72500026" "        | 0.609368026                   |               |
| 2.62500024" "        | 0.588383019                   |               |
| 8.07500076" "        | 0.573998988                   |               |
| 8.57500076" "        | 0.57209003                    |               |
| 2.32500029" "        | 0.563531995                   |               |
| 1.97500026" "        | 0.556529999                   |               |
| 7.07500029" "        | 0.556261003                   |               |
| 4.17500019" "        | 0.549516976                   |               |
| 9.12500000" "        | 0.549178004                   |               |
| <b>7.67500019" "</b> | <b>0.52960598</b><br><b>5</b> | Hippuric acid |
| 4.47500038" "        | 0.529430985                   |               |
| 2.02500033" "        | 0.512973011                   |               |
| 1.12500024" "        | 0.504921973                   |               |
| 3.47500038" "        | 0.497173011                   |               |
| 1.82500029" "        | 0.493827999                   |               |
| <b>0.97500026" "</b> | <b>0.49331000</b><br><b>4</b> | Valine        |
| 6.82500029" "        | 0.483013004                   |               |
| 6.87500048" "        | 0.479968011                   |               |
| 1.62500024" "        | 0.470990986                   |               |
| 1.52500021" "        | 0.470589012                   |               |
| 0.92500025" "        | 0.469552994                   |               |
| 1.57500029" "        | 0.467061996                   |               |

|               |             |  |
|---------------|-------------|--|
| 1.27500021" " | 0.464507997 |  |
| 6.97500038" " | 0.460750997 |  |
| 1.07500029" " | 0.450549006 |  |
| 7.87500048" " | 0.448967993 |  |
| 2.82500029" " | 0.446545005 |  |
| 2.92500019" " | 0.440290987 |  |
| 2.77500033" " | 0.436857015 |  |
| 4.37500048" " | 0.429668009 |  |
| 6.62500048" " | 0.42809099  |  |
| 4.22500038" " | 0.427345991 |  |
| 7.22500038" " | 0.421555996 |  |
| 8.27500057" " | 0.421526998 |  |
| 4.32500029" " | 0.410066009 |  |
| 8.12500000" " | 0.408854991 |  |
| 0.87500024" " | 0.405831993 |  |
| 7.97500038" " | 0.39586699  |  |
| 2.97500038" " | 0.379444987 |  |
| 4.27500010" " | 0.37340501  |  |
| 8.32500076" " | 0.365776986 |  |
| 8.17500019" " | 0.344644994 |  |
| 8.87500000" " | 0.343387991 |  |
| 8.62500000" " | 0.339143008 |  |
| 0.82500023" " | 0.327154994 |  |
| 1.02500021" " | 0.323163986 |  |
| 0.77500021" " | 0.314696997 |  |
| 7.92500019" " | 0.312976003 |  |
| 0.72500026" " | 0.310793996 |  |
| 7.72500038" " | 0.303645015 |  |
| 7.27500057" " | 0.302733004 |  |
| 6.67500019" " | 0.291162997 |  |
| 8.37500000" " | 0.286697    |  |
| 7.77500057" " | 0.283562988 |  |
| 6.77500057" " | 0.275002003 |  |
| 7.02500057" " | 0.270597011 |  |
| 8.47500038" " | 0.263000011 |  |
| 6.92500019" " | 0.262486994 |  |
| 6.72500038" " | 0.245100006 |  |
| 3.67500019" " | 0.233806998 |  |
| 0.62500024"   | 0.228296995 |  |
| 8.52500057" " | 0.228003994 |  |
| 0.67500025" " | 0.215964004 |  |
| 6.57500029" " | 0.200363994 |  |
| 8.42500019" " | 0.175882995 |  |
| 6.52500010" " | 0.157995999 |  |
| 8.02500057" " | 0.104621999 |  |
| 8.67500019" " | 0.085220799 |  |

|               |             |  |
|---------------|-------------|--|
| 9.07500076" " | 0.082114503 |  |
| 9.02500057" " | 0.079643801 |  |
| 9.92500019" " | 0.073346503 |  |
| 8.97500038" " | 0.068037197 |  |
| 9.97500038" " | 0.065927498 |  |
| 9.82500076" " | 0.065760799 |  |
| 9.87500000" " | 0.064868197 |  |
| 8.77500057" " | 0.064815402 |  |
| 9.52500057" " | 0.063196503 |  |
| 9.37500000" " | 0.063153602 |  |
| 9.62500000" " | 0.060855899 |  |
| 9.42500019" " | 0.059576701 |  |
| 9.17500019" " | 0.058416001 |  |
| 9.27500057" " | 0.057606298 |  |
| 9.77500057" " | 0.056871999 |  |
| 9.47500038" " | 0.056492001 |  |
| 9.32500076" " | 0.055498101 |  |
| 9.67500019" " | 0.052842502 |  |
| 9.57500076" " | 0.051442001 |  |
| 9.72500038" " | 0.0470392   |  |
| 8.92500019" " | 0.044805601 |  |
| 9.22500038" " | 0.0435877   |  |
| 8.72500038" " | 0.042292599 |  |
| 4.52500010" " | 0.031485599 |  |

### VIP for PLS-DA regarding non-frail vs. pre-frail vs. frail

| Primary ID (chemical shift) | VIP                | Targeted metabolites                                    |
|-----------------------------|--------------------|---------------------------------------------------------|
| <b>2.17500019" "</b>        | <b>2.621119976</b> | Paracetamol (Acetaminophen) + Acetaminophen glucuronide |
| 3.02500033" "               | 2.617899895        |                                                         |
| 3.62500024" "               | 2.466789961        |                                                         |
| 3.87500024" "               | 2.466470003        |                                                         |
| <b>7.12500048" "</b>        | <b>2.291450024</b> | Acetaminophen derivates                                 |
| <b>7.17500019" "</b>        | <b>2.124409914</b> | Acetaminophen derivates                                 |
| 3.77500033" "               | 2.122129917        |                                                         |
| 2.12500024" "               | 2.034060001        |                                                         |
| 4.07500029" "               | 1.972609997        |                                                         |
| 3.17500019" "               | 1.931540012        |                                                         |
| 7.42500019" "               | 1.870519996        |                                                         |
| 7.52500057" "               | 1.812280059        |                                                         |

|               |             |  |
|---------------|-------------|--|
| 7.82500029" " | 1.762500048 |  |
| 2.32500029" " | 1.721240044 |  |
| 2.27500033" " | 1.69216001  |  |
| 7.32500029" " | 1.684129953 |  |
| 3.82500029" " | 1.653949976 |  |
| 4.02500010" " | 1.633700013 |  |
| 4.17500019" " | 1.543280005 |  |
| 3.97500038" " | 1.519109964 |  |
| 2.07500029" " | 1.480399966 |  |
| 3.67500019" " | 1.415519953 |  |
| 3.22500038" " | 1.413550019 |  |
| 3.52500033" " | 1.365589976 |  |
| 2.47500038" " | 1.322620034 |  |
| 7.57500029" " | 1.312250018 |  |
| 1.42500031" " | 1.270120025 |  |
| 1.97500026" " | 1.263640046 |  |
| 1.77500021" " | 1.254109979 |  |
| 3.12500024" " | 1.239650011 |  |
| 3.27500033" " | 1.233690023 |  |
| 7.62500048" " | 1.213289976 |  |
| 1.72500026" " | 1.203529954 |  |
| 4.32500029" " | 1.20144999  |  |
| 2.87500024" " | 1.196760058 |  |
| 4.22500038" " | 1.196689963 |  |
| 2.67500019" " | 1.158910036 |  |
| 1.62500024" " | 1.158480048 |  |
| 7.47500038" " | 1.132200003 |  |
| 3.57500029" " | 1.110460043 |  |
| 3.47500038" " | 1.09691     |  |
| 2.02500033" " | 1.095469952 |  |
| 7.37500048" " | 1.086770058 |  |
| 3.07500029" " | 1.083220005 |  |
| 1.87500024" " | 1.079749942 |  |
| 2.72500038" " | 1.076120019 |  |
| 4.27500010" " | 1.041120052 |  |
| 1.57500029" " | 1.000499964 |  |
| 2.42500019" " | 0.994534016 |  |
| 4.42500019" " | 0.985616028 |  |
| 3.92500019" " | 0.984224021 |  |
| 4.37500048" " | 0.971475005 |  |
| 0.87500024" " | 0.96302402  |  |
| 2.22500038" " | 0.957993984 |  |
| 4.47500038" " | 0.943037987 |  |
| 1.82500029" " | 0.940477014 |  |
| 7.92500019" " | 0.920060992 |  |
| 2.52500033" " | 0.900605023 |  |



|               |             |  |
|---------------|-------------|--|
| 2.92500019" " | 0.891274989 |  |
| 1.67500031" " | 0.871165991 |  |
| 8.82500076" " | 0.839631975 |  |
| 7.22500038" " | 0.832316995 |  |
| 2.57500029" " | 0.825942993 |  |
| 1.07500029" " | 0.81397599  |  |
| 4.12500048" " | 0.807277024 |  |
| 2.77500033" " | 0.803331971 |  |
| 2.37500024" " | 0.796149015 |  |
| 2.97500038" " | 0.778917015 |  |
| 1.17500019" " | 0.750138998 |  |
| 1.47500026" " | 0.717920005 |  |
| 1.92500031" " | 0.710305989 |  |
| 8.57500076" " | 0.686053991 |  |
| 0.72500026" " | 0.650497019 |  |
| 7.67500019" " | 0.63865602  |  |
| 2.62500024" " | 0.614539981 |  |
| 9.12500000" " | 0.609982014 |  |
| 7.02500057" " | 0.59641403  |  |
| 1.22500026" " | 0.588941991 |  |
| 8.47500038" " | 0.572656989 |  |
| 3.37500024" " | 0.56212002  |  |
| 7.27500057" " | 0.560696006 |  |
| 6.97500038" " | 0.559583008 |  |
| 6.92500019" " | 0.559319019 |  |
| 2.82500029" " | 0.539941013 |  |
| 0.97500026" " | 0.530727983 |  |
| 3.42500019" " | 0.511327028 |  |
| 7.77500057" " | 0.508264005 |  |
| 0.92500025" " | 0.491261989 |  |
| 8.62500000" " | 0.471403003 |  |
| 1.37500024" " | 0.465869009 |  |
| 6.62500048" " | 0.463712007 |  |
| 3.72500038" " | 0.462334007 |  |
| 7.07500029" " | 0.46154201  |  |
| 3.32500029" " | 0.429926008 |  |
| 1.32500029" " | 0.42850399  |  |
| 6.82500029" " | 0.421849996 |  |
| 0.67500025" " | 0.420361996 |  |
| 1.27500021" " | 0.384627014 |  |
| 0.82500023" " | 0.381965011 |  |
| 6.57500029" " | 0.381561995 |  |
| 1.02500021" " | 0.375689    |  |
| 1.52500021" " | 0.368059993 |  |
| 6.67500019" " | 0.364618003 |  |
| 1.12500024" " | 0.360635996 |  |

|               |             |  |
|---------------|-------------|--|
| 7.72500038" " | 0.33949101  |  |
| 8.87500000" " | 0.329645008 |  |
| 0.77500021" " | 0.315535009 |  |
| 8.07500076" " | 0.309215993 |  |
| 6.72500038" " | 0.304587007 |  |
| 0.62500024"   | 0.290042996 |  |
| 6.52500010" " | 0.248482004 |  |
| 8.17500019" " | 0.236695006 |  |
| 8.32500076" " | 0.224267006 |  |
| 8.22500038" " | 0.195954993 |  |
| 8.27500057" " | 0.191910997 |  |
| 8.67500019" " | 0.183440998 |  |
| 7.97500038" " | 0.177037999 |  |
| 8.52500057" " | 0.169108003 |  |
| 9.07500076" " | 0.168966994 |  |
| 8.42500019" " | 0.166018993 |  |
| 8.37500000" " | 0.163282007 |  |
| 6.87500048" " | 0.160127997 |  |
| 6.77500057" " | 0.154459998 |  |
| 7.87500048" " | 0.139191002 |  |
| 8.12500000" " | 0.13651     |  |
| 8.77500057" " | 0.136365995 |  |
| 9.97500038" " | 0.131915003 |  |
| 9.02500057" " | 0.130785003 |  |
| 8.02500057" " | 0.129278004 |  |
| 9.92500019" " | 0.129040003 |  |
| 9.87500000" " | 0.127765998 |  |
| 9.82500076" " | 0.127290994 |  |
| 9.62500000" " | 0.125210002 |  |
| 9.17500019" " | 0.124076001 |  |
| 9.37500000" " | 0.123880997 |  |
| 8.72500038" " | 0.123186    |  |
| 9.67500019" " | 0.12314     |  |
| 9.52500057" " | 0.121652    |  |
| 9.32500076" " | 0.121462002 |  |
| 8.92500019" " | 0.120945998 |  |
| 9.47500038" " | 0.119561002 |  |
| 9.42500019" " | 0.118308999 |  |
| 9.77500057" " | 0.116705999 |  |
| 9.57500076" " | 0.113314003 |  |
| 9.22500038" " | 0.112209998 |  |
| 8.97500038" " | 0.109160997 |  |
| 9.27500057" " | 0.095765002 |  |
| 4.52500010" " | 0.092202596 |  |
| 9.72500038" " | 0.087254703 |  |

### VIP for PLS-DA regarding non-frail vs. frail

| Primary ID (chemical shift) | VIP                | Targeted metabolites                                    |
|-----------------------------|--------------------|---------------------------------------------------------|
| 3.62500024" "               | 3.454440117        |                                                         |
| 3.02500033" "               | 3.097249985        |                                                         |
| <b>2.17500019" "</b>        | <b>2.919209957</b> | Paracetamol (Acetaminophen) + Acetaminophen glucuronide |
| <b>7.12500048" "</b>        | <b>2.666670084</b> | Acetaminophen derivatives                               |
| 7.32500029" "               | 2.505949974        |                                                         |
| 3.57500029" "               | 2.278759956        |                                                         |
| 4.07500029" "               | 2.217700005        |                                                         |
| 3.87500024" "               | 2.185780048        |                                                         |
| 7.42500019" "               | 2.125240088        |                                                         |
| 3.27500033" "               | 2.102649927        |                                                         |
| 3.97500038" "               | 1.812489986        |                                                         |
| 4.42500019" "               | 1.651720047        |                                                         |
| 3.92500019" "               | 1.627429962        |                                                         |
| 2.87500024" "               | 1.615700006        |                                                         |
| 7.37500048" "               | 1.57573998         |                                                         |
| 7.82500029" "               | 1.514790058        |                                                         |
| 4.02500010" "               | 1.505769968        |                                                         |
| 7.57500029" "               | 1.479060054        |                                                         |
| 7.27500057" "               | 1.459339976        |                                                         |
| 3.52500033" "               | 1.458119988        |                                                         |
| 3.67500019" "               | 1.395799994        |                                                         |
| 7.47500038" "               | 1.374060035        |                                                         |
| 7.22500038" "               | 1.368549943        |                                                         |
| 3.72500038" "               | 1.365759969        |                                                         |
| 3.22500038" "               | 1.340330005        |                                                         |
| 4.32500029" "               | 1.295719981        |                                                         |
| 1.87500024" "               | 1.27128005         |                                                         |
| 2.32500029" "               | 1.167850018        |                                                         |
| 1.92500031" "               | 1.150570035        |                                                         |
| 8.82500076" "               | 1.106809974        |                                                         |
| 2.12500024" "               | 1.083619952        |                                                         |
| 0.92500025" "               | 1.076050043        |                                                         |
| 1.47500026" "               | 1.071099997        |                                                         |
| 1.32500029" "               | 1.041120052        |                                                         |
| 1.42500031" "               | 1.038969994        |                                                         |
| 7.02500057" "               | 1.037529945        |                                                         |
| 3.07500029" "               | 1.021450043        |                                                         |
| 2.47500038" "               | 1.013219953        |                                                         |

|                      |                               |                           |
|----------------------|-------------------------------|---------------------------|
| 1.17500019" "        | 0.998085976                   |                           |
| 1.52500021" "        | 0.995872021                   |                           |
| <b>7.62500048" "</b> | <b>0.97261697</b><br><b>1</b> | Hippuric acid             |
| 1.57500029" "        | 0.964936018                   |                           |
| 3.12500024" "        | 0.945870996                   |                           |
| 2.27500033" "        | 0.940083981                   |                           |
| 2.67500019" "        | 0.920063019                   |                           |
| 2.57500029" "        | 0.910143971                   |                           |
| 3.77500033" "        | 0.896764994                   |                           |
| 3.32500029" "        | 0.895362973                   |                           |
| 2.02500033" "        | 0.891874015                   |                           |
| <b>7.17500019" "</b> | <b>0.87661701</b><br><b>4</b> | Acetaminophen derivatives |
| 3.17500019" "        | 0.872853994                   |                           |
| 2.62500024" "        | 0.853223026                   |                           |
| 2.42500019" "        | 0.848438978                   |                           |
| 2.72500038" "        | 0.846161008                   |                           |
| 0.97500026" "        | 0.842419982                   |                           |
| 1.62500024" "        | 0.831054986                   |                           |
| 7.92500019" "        | 0.800468981                   |                           |
| 1.22500026" "        | 0.784087002                   |                           |
| 9.12500000" "        | 0.744544029                   |                           |
| 4.37500048" "        | 0.733959973                   |                           |
| 3.42500019" "        | 0.729426026                   |                           |
| 0.72500026" "        | 0.721149981                   |                           |
| 4.27500010" "        | 0.710471988                   |                           |
| 2.52500033" "        | 0.709295988                   |                           |
| 2.92500019" "        | 0.700329006                   |                           |
| 8.47500038" "        | 0.656902015                   |                           |
| 4.47500038" "        | 0.65635401                    |                           |
| 4.22500038" "        | 0.654479027                   |                           |
| 4.12500048" "        | 0.650339007                   |                           |
| 7.52500057" "        | 0.640393972                   |                           |
| 1.27500021" "        | 0.632025003                   |                           |
| 1.82500029" "        | 0.629858971                   |                           |
| 1.37500024" "        | 0.628601015                   |                           |
| 2.22500038" "        | 0.617352009                   |                           |
| 8.02500057" "        | 0.610783994                   |                           |
| 4.17500019" "        | 0.609121025                   |                           |
| 1.12500024" "        | 0.608013988                   |                           |
| 8.07500076" "        | 0.589842021                   |                           |
| 6.97500038" "        | 0.588469028                   |                           |
| 0.87500024" "        | 0.580259979                   |                           |
| 1.07500029" "        | 0.548677981                   |                           |
| 7.07500029" "        | 0.546272993                   |                           |
| 1.67500031" "        | 0.544571996                   |                           |

|                      |                               |               |
|----------------------|-------------------------------|---------------|
| 3.37500024" "        | 0.526149988                   |               |
| 1.72500026" "        | 0.475430995                   |               |
| 1.77500021" "        | 0.474720001                   |               |
| 2.82500029" "        | 0.471480012                   |               |
| 2.37500024" "        | 0.471421003                   |               |
| 2.97500038" "        | 0.464751989                   |               |
| 3.47500038" "        | 0.460727006                   |               |
| 3.82500029" "        | 0.457672                      |               |
| 1.02500021" "        | 0.45728901                    |               |
| <b>7.67500019" "</b> | <b>0.43838301</b><br><b>3</b> | Hippuric acid |
| 2.77500033" "        | 0.430925995                   |               |
| 0.82500023" "        | 0.416177005                   |               |
| 2.07500029" "        | 0.414418012                   |               |
| 8.57500076" "        | 0.399253994                   |               |
| 8.87500000" "        | 0.382472992                   |               |
| 8.17500019" "        | 0.374899                      |               |
| 7.77500057" "        | 0.352337003                   |               |
| 6.92500019" "        | 0.351927012                   |               |
| 8.62500000" "        | 0.344518989                   |               |
| 8.12500000" "        | 0.342314005                   |               |
| 1.97500026" "        | 0.336214989                   |               |
| 6.62500048" "        | 0.332626998                   |               |
| 0.62500024" "        | 0.331806988                   |               |
| 8.27500057" "        | 0.329948008                   |               |
| 0.77500021" "        | 0.323285013                   |               |
| 6.77500057" "        | 0.313609987                   |               |
| 8.22500038" "        | 0.312730014                   |               |
| 0.67500025" "        | 0.289485991                   |               |
| 6.87500048" "        | 0.289072007                   |               |
| 8.37500000" "        | 0.268164992                   |               |
| 6.82500029" "        | 0.260825008                   |               |
| 7.72500038" "        | 0.258183002                   |               |
| 6.52500010" "        | 0.239063993                   |               |
| 6.57500029" "        | 0.223114997                   |               |
| 8.52500057" "        | 0.214689001                   |               |
| 7.87500048" "        | 0.210011005                   |               |
| 6.72500038" "        | 0.190148994                   |               |
| 8.42500019" "        | 0.147286996                   |               |
| 6.67500019" "        | 0.139761001                   |               |
| 7.97500038" "        | 0.120927997                   |               |
| 8.77500057" "        | 0.120274998                   |               |
| 8.32500076" "        | 0.114081003                   |               |
| 8.72500038" "        | 0.090801403                   |               |
| 4.52500010" "        | 0.080738999                   |               |
| 9.72500038" "        | 0.080002204                   |               |
| 9.27500057" "        | 0.065201998                   |               |

|               |             |  |
|---------------|-------------|--|
| 8.67500019" " | 0.048496801 |  |
| 9.47500038" " | 0.047562402 |  |
| 9.77500057" " | 0.047542401 |  |
| 9.02500057" " | 0.045168102 |  |
| 9.57500076" " | 0.037988201 |  |
| 9.32500076" " | 0.037558001 |  |
| 9.22500038" " | 0.037190098 |  |
| 9.67500019" " | 0.034524601 |  |
| 9.07500076" " | 0.033525299 |  |
| 9.52500057" " | 0.033387899 |  |
| 8.92500019" " | 0.0324503   |  |
| 9.17500019" " | 0.0316412   |  |
| 9.37500000" " | 0.0311174   |  |
| 9.87500000" " | 0.030564001 |  |
| 9.62500000" " | 0.029415799 |  |
| 9.92500019" " | 0.0270292   |  |
| 9.82500076" " | 0.026491901 |  |
| 9.42500019" " | 0.025451699 |  |
| 8.97500038" " | 0.0253853   |  |
| 9.97500038" " | 0.016777501 |  |

### VIP for PLS-DA regarding total FIM

| Primary ID (chemical shift) | VIP                | Targeted metabolites                                    |
|-----------------------------|--------------------|---------------------------------------------------------|
| <b>2.17500019" "</b>        | <b>3.507910013</b> | Paracetamol (Acetaminophen) + Acetaminophen glucuronide |
| 3.62500024" "               | 2.895889997        |                                                         |
| 1.92500031" "               | 2.57359004         |                                                         |
| 7.82500029" "               | 2.220020056        |                                                         |
| <b>7.12500048" "</b>        | <b>2.147399902</b> | Acetaminophen derivatives                               |
| 7.32500029" "               | 2.137599945        |                                                         |
| 3.97500038" "               | 2.033760071        |                                                         |
| 3.27500033" "               | 2.015810013        |                                                         |
| 3.47500038" "               | 1.959319949        |                                                         |
| 3.02500033" "               | 1.807489991        |                                                         |
| 7.37500048" "               | 1.686609983        |                                                         |
| 7.57500029" "               | 1.655910015        |                                                         |
| 7.52500057" "               | 1.630929947        |                                                         |
| 1.42500031" "               | 1.552189946        |                                                         |
| 3.77500033" "               | 1.497400045        |                                                         |
| 3.57500029" "               | 1.406389952        |                                                         |
| 7.62500048" "               | 1.404539943        |                                                         |
| 0.87500024" "               | 1.396939993        |                                                         |

|                      |                   |                             |
|----------------------|-------------------|-----------------------------|
| 2.47500038" "        | 1.395370007       |                             |
| 3.92500019" "        | 1.387320042       |                             |
| 7.27500057" "        | 1.365689993       |                             |
| 3.42500019" "        | 1.359899998       |                             |
| 4.07500029" "        | 1.35698998        |                             |
| 3.72500038" "        | 1.332020044       |                             |
| 1.27500021" "        | 1.329550028       |                             |
| 2.57500029" "        | 1.326920033       |                             |
| 4.02500010" "        | 1.31408           |                             |
| 7.42500019" "        | 1.292050004       |                             |
| 4.42500019" "        | 1.28204           |                             |
| 2.22500038" "        | 1.272699952       |                             |
| 7.22500038" "        | 1.25030005        |                             |
| 3.87500024" "        | 1.228559971       |                             |
| 2.67500019" "        | 1.223109961       |                             |
| 3.12500024" "        | 1.22021997        |                             |
| 2.32500029" "        | 1.212139964       |                             |
| 7.47500038" "        | 1.193510056       |                             |
| 2.72500038" "        | 1.169039965       |                             |
| 4.17500019" "        | 1.159190059       |                             |
| 3.52500033" "        | 1.143460035       |                             |
| 3.67500019" "        | 1.107609987       |                             |
| 1.17500019" "        | 1.103770018       |                             |
| 3.37500024" "        | 1.091519952       |                             |
| 2.52500033" "        | 1.063269973       |                             |
| 4.27500010" "        | 1.048629999       |                             |
| 1.22500026" "        | 1.045660019       |                             |
| 3.22500038" "        | 1.038300037       |                             |
| 1.32500029" "        | 1.036730051       |                             |
| 1.87500024" "        | 1.034340024       |                             |
| 3.82500029" "        | 1.017740011       |                             |
| 2.27500033" "        | 1.009140015       |                             |
| 2.07500029" "        | 0.98634702        |                             |
| 8.82500076" "        | 0.984538972       |                             |
| 1.47500026" "        | 0.932119012       |                             |
| 1.72500026" "        | 0.922908008       |                             |
| 0.92500025" "        | 0.922538996       |                             |
| 6.92500019" "        | 0.911436021       |                             |
| 4.12500048" "        | 0.862652004       |                             |
| 1.67500031" "        | 0.857032001       |                             |
| 1.07500029" "        | 0.852024972       |                             |
| 1.62500024" "        | 0.850190997       |                             |
| 1.02500021" "        | 0.848508          |                             |
| 2.12500024" "        | 0.83664           |                             |
| 0.97500026" "        | 0.82872802        |                             |
| <b>7.17500019" "</b> | <b>0.81079697</b> | 6 Acetaminophen derivatives |
|                      | <b>6</b>          |                             |

|               |             |  |
|---------------|-------------|--|
| 1.77500021" " | 0.779514015 |  |
| 1.57500029" " | 0.757265985 |  |
| 3.32500029" " | 0.74387598  |  |
| 8.07500076" " | 0.737294972 |  |
| 4.32500029" " | 0.734041989 |  |
| 2.97500038" " | 0.718600988 |  |
| 3.17500019" " | 0.714731991 |  |
| 7.72500038" " | 0.712873995 |  |
| 2.37500024" " | 0.702413023 |  |
| 9.12500000" " | 0.698108971 |  |
| 7.02500057" " | 0.685755014 |  |
| 1.97500026" " | 0.685643971 |  |
| 1.82500029" " | 0.68244499  |  |
| 4.37500048" " | 0.68206799  |  |
| 4.22500038" " | 0.678451002 |  |
| 2.92500019" " | 0.675050974 |  |
| 3.07500029" " | 0.672038019 |  |
| 7.92500019" " | 0.671432972 |  |
| 8.47500038" " | 0.643477976 |  |
| 2.02500033" " | 0.633783996 |  |
| 8.57500076" " | 0.632566988 |  |
| 6.87500048" " | 0.630869985 |  |
| 4.47500038" " | 0.628924012 |  |
| 1.37500024" " | 0.625042975 |  |
| 1.52500021" " | 0.601720989 |  |
| 7.67500019" " | 0.594356    |  |
| 2.82500029" " | 0.574029982 |  |
| 1.12500024" " | 0.544685006 |  |
| 2.42500019" " | 0.533536971 |  |
| 2.77500033" " | 0.532441974 |  |
| 2.62500024" " | 0.512243986 |  |
| 0.72500026" " | 0.508642972 |  |
| 8.62500000" " | 0.423851013 |  |
| 0.82500023" " | 0.397287011 |  |
| 8.32500076" " | 0.365197003 |  |
| 6.57500029" " | 0.364463001 |  |
| 8.22500038" " | 0.356682986 |  |
| 8.27500057" " | 0.342691004 |  |
| 0.77500021" " | 0.334650993 |  |
| 7.07500029" " | 0.329358011 |  |
| 2.87500024" " | 0.325926006 |  |
| 6.97500038" " | 0.323323011 |  |
| 8.87500000" " | 0.313636005 |  |
| 0.67500025" " | 0.306818008 |  |
| 0.62500024"   | 0.280856997 |  |
| 6.82500029" " | 0.243205994 |  |



|               |             |  |
|---------------|-------------|--|
| 8.37500000" " | 0.204136997 |  |
| 6.77500057" " | 0.192056    |  |
| 7.87500048" " | 0.189191997 |  |
| 6.52500010" " | 0.186387002 |  |
| 7.97500038" " | 0.183009997 |  |
| 7.77500057" " | 0.171222001 |  |
| 6.67500019" " | 0.163661003 |  |
| 8.42500019" " | 0.150803998 |  |
| 8.52500057" " | 0.141563997 |  |
| 6.72500038" " | 0.123822004 |  |
| 6.62500048" " | 0.102707997 |  |
| 8.67500019" " | 0.080725901 |  |
| 8.97500038" " | 0.0647965   |  |
| 9.82500076" " | 0.057742    |  |
| 8.77500057" " | 0.0577267   |  |
| 9.22500038" " | 0.056444898 |  |
| 8.02500057" " | 0.0549049   |  |
| 9.07500076" " | 0.0523431   |  |
| 9.27500057" " | 0.051940601 |  |
| 9.92500019" " | 0.050994098 |  |
| 9.02500057" " | 0.050936699 |  |
| 8.17500019" " | 0.049567401 |  |
| 9.52500057" " | 0.048691101 |  |
| 9.97500038" " | 0.048231501 |  |
| 9.87500000" " | 0.048103701 |  |
| 9.77500057" " | 0.045664798 |  |
| 9.42500019" " | 0.043876499 |  |
| 9.62500000" " | 0.0438172   |  |
| 9.47500038" " | 0.043655101 |  |
| 8.92500019" " | 0.043543    |  |
| 9.32500076" " | 0.043239001 |  |
| 8.12500000" " | 0.043184999 |  |
| 9.17500019" " | 0.041376401 |  |
| 9.37500000" " | 0.040614299 |  |
| 9.57500076" " | 0.040134799 |  |
| 8.72500038" " | 0.038870499 |  |
| 9.67500019" " | 0.038605802 |  |
| 9.72500038" " | 0.030107301 |  |
| 4.52500010" " | 0.0256663   |  |

**VIP for PLS-DA regarding motor component of FIM**

| Primary ID (chemical shift) | VIP                           | Targeted metabolites                                    |
|-----------------------------|-------------------------------|---------------------------------------------------------|
| <b>2.17500019</b> " "       | <b>3.54028010</b><br><b>4</b> | Paracetamol (Acetaminophen) + Acetaminophen glucuronide |
| 3.62500024 " "              | 3.164220095                   |                                                         |
| <b>7.12500048</b> " "       | <b>2.70602989</b><br><b>2</b> | Acetaminophen derivatives                               |
| 3.27500033 " "              | 2.573440075                   |                                                         |
| 4.07500029 " "              | 2.467999935                   |                                                         |
| 3.97500038 " "              | 2.323559999                   |                                                         |
| 3.02500033 " "              | 2.307369947                   |                                                         |
| 7.82500029 " "              | 2.286619902                   |                                                         |
| 7.32500029 " "              | 2.238549948                   |                                                         |
| <b>1.92500031</b> " "       | <b>1.94774997</b><br><b>2</b> | Acetate                                                 |
| <b>3.57500029</b> " "       | <b>1.89581000</b><br><b>8</b> | Glycine                                                 |
| 2.67500019 " "              | 1.870460033                   |                                                         |
| 7.57500029 " "              | 1.669399977                   |                                                         |
| 7.37500048 " "              | 1.669059992                   |                                                         |
| 7.52500057 " "              | 1.64388001                    |                                                         |
| 8.82500076 " "              | 1.463950038                   |                                                         |
| 0.87500024 " "              | 1.456159949                   |                                                         |
| 3.87500024 " "              | 1.446959972                   |                                                         |
| 7.62500048 " "              | 1.441059947                   |                                                         |
| 4.42500019 " "              | 1.38530004                    |                                                         |
| 3.32500029 " "              | 1.357059956                   |                                                         |
| <b>7.17500019</b> " "       | <b>1.34720003</b><br><b>6</b> | Acetaminophen derivatives                               |
| 2.12500024 " "              | 1.308109999                   |                                                         |
| 2.57500029 " "              | 1.302189946                   |                                                         |
| 3.77500033 " "              | 1.301290035                   |                                                         |
| 8.07500076 " "              | 1.272570014                   |                                                         |
| 4.02500010 " "              | 1.263440013                   |                                                         |
| 2.52500033 " "              | 1.250480056                   |                                                         |
| 3.22500038 " "              | 1.201089978                   |                                                         |
| 3.72500038 " "              | 1.161170006                   |                                                         |
| 1.27500021 " "              | 1.142920017                   |                                                         |
| 3.92500019 " "              | 1.118489981                   |                                                         |
| 2.87500024 " "              | 1.070240021                   |                                                         |
| 1.42500031 " "              | 1.070160031                   |                                                         |
| 3.52500033 " "              | 1.055189967                   |                                                         |
| 2.47500038 " "              | 1.046519995                   |                                                         |
| 3.82500029 " "              | 1.023939967                   |                                                         |
| 9.12500000 " "              | 1.000180006                   |                                                         |
| 7.02500057 " "              | 0.992079973                   |                                                         |
| 3.12500024 " "              | 0.965856016                   |                                                         |

|                      |                   |                  |
|----------------------|-------------------|------------------|
| 6.97500038" "        | 0.924398005       |                  |
| 3.67500019" "        | 0.916547          |                  |
| 4.32500029" "        | 0.907444          |                  |
| 2.32500029" "        | 0.896317005       |                  |
| 7.42500019" "        | 0.84702599        |                  |
| 3.07500029" "        | 0.837459028       |                  |
| 1.32500029" "        | 0.831602991       |                  |
| 1.22500026" "        | 0.829024971       |                  |
| 3.17500019" "        | 0.827152014       |                  |
| 2.82500029" "        | 0.810347021       |                  |
| 4.27500010" "        | 0.795050979       |                  |
| 1.02500021" "        | 0.794301987       |                  |
| 1.07500029" "        | 0.786082983       |                  |
| 7.07500029" "        | 0.778559983       |                  |
| 3.37500024" "        | 0.768333018       |                  |
| 4.47500038" "        | 0.755715013       |                  |
| 1.17500019" "        | 0.749069989       |                  |
| 3.42500019" "        | 0.744826019       |                  |
| 0.92500025" "        | 0.737303019       |                  |
| 7.47500038" "        | 0.725162029       |                  |
| 7.97500038" "        | 0.722177982       |                  |
| 8.57500076" "        | 0.716573          |                  |
| 4.17500019" "        | 0.698027015       |                  |
| 1.47500026" "        | 0.697835028       |                  |
| 2.42500019" "        | 0.686851978       |                  |
| 0.72500026" "        | 0.680082023       |                  |
| 2.77500033" "        | 0.679543018       |                  |
| <b>2.22500038" "</b> | <b>0.66575497</b> | <b>4</b> Acetone |
| 2.37500024" "        | 0.653419971       |                  |
| 4.12500048" "        | 0.641063988       |                  |
| 1.87500024" "        | 0.638963997       |                  |
| 8.47500038" "        | 0.622466981       |                  |
| 2.62500024" "        | 0.61709702        |                  |
| 1.82500029" "        | 0.612757027       |                  |
| 7.67500019" "        | 0.610632002       |                  |
| 3.47500038" "        | 0.605764985       |                  |
| 2.97500038" "        | 0.602792025       |                  |
| 2.02500033" "        | 0.602522016       |                  |
| 1.62500024" "        | 0.592383027       |                  |
| 7.72500038" "        | 0.58287698        |                  |
| 1.52500021" "        | 0.577071011       |                  |
| 6.82500029" "        | 0.553602993       |                  |
| 4.37500048" "        | 0.549178004       |                  |
| 1.37500024" "        | 0.540980995       |                  |
| 2.92500019" "        | 0.532335997       |                  |
| 4.22500038" "        | 0.511853993       |                  |

|                      |                   |                 |
|----------------------|-------------------|-----------------|
| 1.67500031" "        | 0.486193001       |                 |
| 7.22500038" "        | 0.484183013       |                 |
| 1.57500029" "        | 0.483810991       |                 |
| 0.97500026" "        | 0.483559996       |                 |
| 1.77500021" "        | 0.475443989       |                 |
| 6.87500048" "        | 0.450325012       |                 |
| 8.62500000" "        | 0.433279008       |                 |
| 2.07500029" "        | 0.431243986       |                 |
| 7.27500057" "        | 0.427237988       |                 |
| 8.87500000" "        | 0.422962993       |                 |
| 7.77500057" "        | 0.416563988       |                 |
| 2.27500033" "        | 0.412259996       |                 |
| 6.62500048" "        | 0.399426997       |                 |
| 1.72500026" "        | 0.397323012       |                 |
| 6.77500057" "        | 0.39261201        |                 |
| 1.12500024" "        | 0.382423997       |                 |
| 8.17500019" "        | 0.37281099        |                 |
| <b>2.72500038" "</b> | <b>0.36721599</b> | 1 Dimethylamine |
|                      | <b>1</b>          |                 |
| 7.87500048" "        | 0.338402987       |                 |
| 0.82500023" "        | 0.333602995       |                 |
| 8.37500000" "        | 0.326135993       |                 |
| 0.62500024"          | 0.319480002       |                 |
| 6.57500029" "        | 0.308353007       |                 |
| 6.52500010" "        | 0.306014001       |                 |
| 0.67500025" "        | 0.304387987       |                 |
| 8.52500057" "        | 0.303461999       |                 |
| 8.22500038" "        | 0.300437003       |                 |
| 6.92500019" "        | 0.298218995       |                 |
| 7.92500019" "        | 0.288340986       |                 |
| 1.97500026" "        | 0.281796992       |                 |
| 6.67500019" "        | 0.279828995       |                 |
| 0.77500021" "        | 0.262273997       |                 |
| 6.72500038" "        | 0.257734001       |                 |
| 8.32500076" "        | 0.257587999       |                 |
| 8.27500057" "        | 0.218898997       |                 |
| 8.02500057" "        | 0.214447007       |                 |
| 8.12500000" "        | 0.206196994       |                 |
| 8.42500019" "        | 0.165461004       |                 |
| 8.67500019" "        | 0.132401004       |                 |
| 9.02500057" "        | 0.115324996       |                 |
| 8.77500057" "        | 0.109944999       |                 |
| 9.72500038" "        | 0.108014002       |                 |
| 8.97500038" "        | 0.100500003       |                 |
| 9.27500057" "        | 0.096881799       |                 |
| 8.92500019" "        | 0.093246996       |                 |
| 9.67500019" "        | 0.092921101       |                 |

|               |             |  |
|---------------|-------------|--|
| 9.97500038" " | 0.0894325   |  |
| 8.72500038" " | 0.088609204 |  |
| 9.22500038" " | 0.087710597 |  |
| 9.82500076" " | 0.085960403 |  |
| 9.17500019" " | 0.085089602 |  |
| 9.87500000" " | 0.085039802 |  |
| 9.07500076" " | 0.084417097 |  |
| 9.42500019" " | 0.081428401 |  |
| 9.62500000" " | 0.076260403 |  |
| 9.37500000" " | 0.075103603 |  |
| 9.92500019" " | 0.0707964   |  |
| 9.52500057" " | 0.069924198 |  |
| 9.77500057" " | 0.068051398 |  |
| 9.32500076" " | 0.067642398 |  |
| 9.57500076" " | 0.067051597 |  |
| 9.47500038" " | 0.0628362   |  |
| 4.52500010" " | 0.050185699 |  |

### VIP for PLS-DA regarding cognitive component of FIM

| Primary ID (chemical shift) | VIP                | Targeted metabolites                                    |
|-----------------------------|--------------------|---------------------------------------------------------|
| <b>2.17500019" "</b>        | <b>3.580670118</b> | Paracetamol (Acetaminophen) + Acetaminophen glucuronide |
| 3.27500033" "               | 3.120130062        |                                                         |
| 3.62500024" "               | 2.989099979        |                                                         |
| <b>7.12500048" "</b>        | <b>2.876940012</b> | Acetaminophen derivatives                               |
| 4.07500029" "               | 2.445760012        |                                                         |
| 7.32500029" "               | 2.128540039        |                                                         |
| <b>7.17500019" "</b>        | <b>2.019740105</b> | Acetaminophen derivatives                               |
| 3.02500033" "               | 2.00109005         |                                                         |
| 4.02500010" "               | 1.971529961        |                                                         |
| 3.87500024" "               | 1.906350017        |                                                         |
| 1.92500031" "               | 1.833989978        |                                                         |
| 2.12500024" "               | 1.819540024        |                                                         |
| 7.82500029" "               | 1.796790004        |                                                         |
| 3.97500038" "               | 1.785560012        |                                                         |
| 7.22500038" "               | 1.718140006        |                                                         |
| 3.77500033" "               | 1.674640059        |                                                         |
| 7.37500048" "               | 1.636000037        |                                                         |
| 4.42500019" "               | 1.60066998         |                                                         |
| 7.57500029" "               | 1.496700048        |                                                         |
| 3.92500019" "               | 1.38609004         |                                                         |

|                      |                               |               |
|----------------------|-------------------------------|---------------|
| 7.92500019" "        | 1.316509962                   |               |
| 3.17500019" "        | 1.300420046                   |               |
| <b>2.22500038" "</b> | <b>1.22109997</b><br><b>3</b> | Acetone       |
| 3.72500038" "        | 1.21239996                    |               |
| 7.47500038" "        | 1.189399958                   |               |
| <b>2.72500038" "</b> | <b>1.12205004</b><br><b>7</b> | Dimethylamine |
| 7.27500057" "        | 1.077280045                   |               |
| 2.87500024" "        | 1.062770009                   |               |
| 7.62500048" "        | 1.054219961                   |               |
| 3.42500019" "        | 1.052209973                   |               |
| 3.47500038" "        | 1.045979977                   |               |
| 1.17500019" "        | 1.036749959                   |               |
| 1.42500031" "        | 1.016250014                   |               |
| 3.52500033" "        | 1.015699983                   |               |
| 3.37500024" "        | 0.979201019                   |               |
| 3.07500029" "        | 0.972541988                   |               |
| 3.82500029" "        | 0.956556976                   |               |
| 0.87500024" "        | 0.953836024                   |               |
| 1.87500024" "        | 0.94491601                    |               |
| 6.62500048" "        | 0.942669988                   |               |
| 8.82500076" "        | 0.917770982                   |               |
| 4.17500019" "        | 0.914976001                   |               |
| 7.42500019" "        | 0.910874009                   |               |
| 3.57500029" "        | 0.882044971                   |               |
| 2.57500029" "        | 0.869125009                   |               |
| 1.32500029" "        | 0.850059986                   |               |
| 2.27500033" "        | 0.849956989                   |               |
| 0.97500026" "        | 0.833805978                   |               |
| 2.67500019" "        | 0.829720974                   |               |
| 1.22500026" "        | 0.818176985                   |               |
| 9.12500000" "        | 0.804977                      |               |
| 3.67500019" "        | 0.803331017                   |               |
| 4.12500048" "        | 0.798340976                   |               |
| 2.62500024" "        | 0.798174977                   |               |
| 1.72500026" "        | 0.790269017                   |               |
| 1.67500031" "        | 0.776252985                   |               |
| 7.52500057" "        | 0.769765973                   |               |
| 2.52500033" "        | 0.756511986                   |               |
| 4.37500048" "        | 0.752882004                   |               |
| 3.12500024" "        | 0.742497027                   |               |
| 3.22500038" "        | 0.739880979                   |               |
| 6.67500019" "        | 0.734220982                   |               |
| 2.07500029" "        | 0.728034973                   |               |
| 1.77500021" "        | 0.721665025                   |               |
| 8.87500000" "        | 0.697538972                   |               |

|               |              |  |
|---------------|--------------|--|
| 1.62500024" " | 0.694299996  |  |
| 1.47500026" " | 0.685970008  |  |
| 2.32500029" " | 0.676155984  |  |
| 8.02500057" " | 0.675288975  |  |
| 1.02500021" " | 0.674024999  |  |
| 4.22500038" " | 0.666764975  |  |
| 1.57500029" " | 0.663012981  |  |
| 6.92500019" " | 0.659008026  |  |
| 1.12500024" " | 0.658065021  |  |
| 2.37500024" " | 0.649703026  |  |
| 4.47500038" " | 0.646278977  |  |
| 1.27500021" " | 0.639084995  |  |
| 2.92500019" " | 0.639055014  |  |
| 4.32500029" " | 0.634131014  |  |
| 2.47500038" " | 0.632076979  |  |
| 1.82500029" " | 0.62866497   |  |
| 2.97500038" " | 0.619919002  |  |
| 1.97500026" " | 0.616255999  |  |
| 2.82500029" " | 0.599489987  |  |
| 7.02500057" " | 0.598078012  |  |
| 2.77500033" " | 0.574346006  |  |
| 7.07500029" " | 0.566619992  |  |
| 0.92500025" " | 0.564047992  |  |
| 3.32500029" " | 0.560163975  |  |
| 1.07500029" " | 0.559525013  |  |
| 1.37500024" " | 0.539552987  |  |
| 7.67500019" " | 0.536579013  |  |
| 6.82500029" " | 0.529246986  |  |
| 4.27500010" " | 0.516021013  |  |
| 7.97500038" " | 0.507849991  |  |
| 1.52500021" " | 0.501192987  |  |
| 6.57500029" " | 0.485552996  |  |
| 2.42500019" " | 0.482279003  |  |
| 8.07500076" " | 0.473531991  |  |
| 2.02500033" " | 0.468286991  |  |
| 6.52500010" " | 0.450183988  |  |
| 0.77500021" " | 0.448561013  |  |
| 6.72500038" " | 0.4444444001 |  |
| 0.72500026" " | 0.439058006  |  |
| 0.82500023" " | 0.388603002  |  |
| 7.77500057" " | 0.385067999  |  |
| 8.47500038" " | 0.382245988  |  |
| 8.57500076" " | 0.380443007  |  |
| 8.17500019" " | 0.379078001  |  |
| 7.72500038" " | 0.372675002  |  |
| 8.62500000" " | 0.365193993  |  |

|               |             |  |
|---------------|-------------|--|
| 0.67500025" " | 0.363397002 |  |
| 6.87500048" " | 0.361054987 |  |
| 6.77500057" " | 0.343887001 |  |
| 0.62500024"   | 0.322932988 |  |
| 8.12500000" " | 0.279980004 |  |
| 8.52500057" " | 0.246543005 |  |
| 8.37500000" " | 0.234124005 |  |
| 6.97500038" " | 0.198933005 |  |
| 8.22500038" " | 0.191062003 |  |
| 7.87500048" " | 0.179527    |  |
| 8.32500076" " | 0.168852001 |  |
| 8.27500057" " | 0.166382998 |  |
| 8.67500019" " | 0.118749    |  |
| 9.17500019" " | 0.101682    |  |
| 9.97500038" " | 0.084938802 |  |
| 8.92500019" " | 0.079984598 |  |
| 9.37500000" " | 0.075677097 |  |
| 9.47500038" " | 0.071273603 |  |
| 9.62500000" " | 0.070294097 |  |
| 9.42500019" " | 0.070078    |  |
| 8.77500057" " | 0.068929501 |  |
| 9.87500000" " | 0.068564601 |  |
| 8.72500038" " | 0.0683439   |  |
| 9.57500076" " | 0.068337001 |  |
| 9.07500076" " | 0.0666508   |  |
| 9.77500057" " | 0.064819098 |  |
| 9.67500019" " | 0.061509501 |  |
| 9.92500019" " | 0.0606381   |  |
| 9.32500076" " | 0.060236402 |  |
| 9.02500057" " | 0.056683999 |  |
| 8.97500038" " | 0.0558246   |  |
| 9.82500076" " | 0.055767801 |  |
| 9.52500057" " | 0.055245999 |  |
| 9.27500057" " | 0.0551618   |  |
| 9.72500038" " | 0.048636999 |  |
| 9.22500038" " | 0.0460383   |  |
| 4.52500010" " | 0.044241302 |  |
| 8.42500019" " | 0.042750999 |  |

|                                                  |
|--------------------------------------------------|
| <b>VIP for PLS-DA regarding SPPB at baseline</b> |
|--------------------------------------------------|

|                             |     |                      |
|-----------------------------|-----|----------------------|
| Primary ID (chemical shift) | VIP | Targeted metabolites |
|-----------------------------|-----|----------------------|



|                       |                               |                                                         |
|-----------------------|-------------------------------|---------------------------------------------------------|
| <b>2.17500019</b> " " | <b>3.51290988</b><br><b>9</b> | Paracetamol (Acetaminophen) + Acetaminophen glucuronide |
| 3.62500024" "         | 2.815459967                   |                                                         |
| 3.27500033" "         | 2.596070051                   |                                                         |
| 4.07500029" "         | 2.400540113                   |                                                         |
| 3.77500033" "         | 2.246860027                   |                                                         |
| 7.12500048" "         | 2.225270033                   |                                                         |
| 7.82500029" "         | 2.221560001                   |                                                         |
| 7.32500029" "         | 2.199219942                   |                                                         |
| 3.87500024" "         | 2.149600029                   |                                                         |
| 3.97500038" "         | 2.070549965                   |                                                         |
| 2.67500019" "         | 2.01748991                    |                                                         |
| 4.02500010" "         | 2.000869989                   |                                                         |
| 3.82500029" "         | 1.882419944                   |                                                         |
| 7.37500048" "         | 1.854269981                   |                                                         |
| 3.72500038" "         | 1.827110052                   |                                                         |
| 7.57500029" "         | 1.667490005                   |                                                         |
| 3.92500019" "         | 1.649359941                   |                                                         |
| 3.52500033" "         | 1.584100008                   |                                                         |
| 3.57500029" "         | 1.533220053                   |                                                         |
| 3.22500038" "         | 1.506680012                   |                                                         |
| 7.17500019" "         | 1.505849957                   |                                                         |
| 7.62500048" "         | 1.421370029                   |                                                         |
| 7.52500057" "         | 1.420379996                   |                                                         |
| 3.02500033" "         | 1.413159966                   |                                                         |
| 3.67500019" "         | 1.398100019                   |                                                         |
| <b>1.92500031</b> " " | <b>1.37223005</b><br><b>3</b> | Acetate                                                 |
| 0.87500024" "         | 1.334879994                   |                                                         |
| 8.82500076" "         | 1.33265996                    |                                                         |
| 4.42500019" "         | 1.307279944                   |                                                         |
| 7.02500057" "         | 1.277809978                   |                                                         |
| 1.42500031" "         | 1.210500002                   |                                                         |
| 1.17500019" "         | 1.181879997                   |                                                         |
| <b>1.37500024</b> " " | <b>1.16726005</b><br><b>1</b> | Lactate                                                 |
| 1.22500026" "         | 1.148399949                   |                                                         |
| 1.27500021" "         | 1.101240039                   |                                                         |
| 7.27500057" "         | 1.069120049                   |                                                         |
| 6.97500038" "         | 1.057010055                   |                                                         |
| 1.07500029" "         | 1.017740011                   |                                                         |
| 2.57500029" "         | 0.996105015                   |                                                         |
| 1.52500021" "         | 0.989895999                   |                                                         |
| 2.52500033" "         | 0.974425972                   |                                                         |
| 9.12500000" "         | 0.892669022                   |                                                         |
| 3.42500019" "         | 0.891768992                   |                                                         |
| 2.87500024" "         | 0.871680021                   |                                                         |

|                      |                    |         |
|----------------------|--------------------|---------|
| 7.77500057" "        | 0.865637004        |         |
| 3.07500029" "        | 0.858089983        |         |
| 1.32500029" "        | 0.831487           |         |
| <b>2.22500038" "</b> | <b>0.815463006</b> | Acetone |
| 2.47500038" "        | 0.764791012        |         |
| 3.32500029" "        | 0.763934016        |         |
| 4.32500029" "        | 0.755107999        |         |
| 2.32500029" "        | 0.741243005        |         |
| 2.92500019" "        | 0.739591002        |         |
| 7.07500029" "        | 0.738407016        |         |
| 3.37500024" "        | 0.738063991        |         |
| 7.42500019" "        | 0.720871985        |         |
| 3.17500019" "        | 0.712769985        |         |
| 8.07500076" "        | 0.700515985        |         |
| 4.47500038" "        | 0.690396011        |         |
| 3.47500038" "        | 0.68800801         |         |
| 7.47500038" "        | 0.682518005        |         |
| 8.57500076" "        | 0.666337013        |         |
| 4.27500010" "        | 0.657073021        |         |
| 2.62500024" "        | 0.650548995        |         |
| 6.87500048" "        | 0.64408499         |         |
| 2.72500038" "        | 0.641593993        |         |
| 0.72500026" "        | 0.631887019        |         |
| 3.12500024" "        | 0.627487004        |         |
| 4.17500019" "        | 0.626119971        |         |
| 4.12500048" "        | 0.623179972        |         |
| <b>1.47500026" "</b> | <b>0.609432995</b> | Alanine |
| 7.22500038" "        | 0.606330991        |         |
| 2.02500033" "        | 0.601077974        |         |
| 2.12500024" "        | 0.592585027        |         |
| 2.42500019" "        | 0.581004977        |         |
| 4.22500038" "        | 0.574449003        |         |
| 4.37500048" "        | 0.562601984        |         |
| 1.02500021" "        | 0.560297012        |         |
| 2.82500029" "        | 0.559713006        |         |
| 7.97500038" "        | 0.544098973        |         |
| 8.22500038" "        | 0.542212009        |         |
| 1.97500026" "        | 0.542168975        |         |
| 8.02500057" "        | 0.533838987        |         |
| 1.67500031" "        | 0.516384006        |         |
| 1.82500029" "        | 0.499345988        |         |
| 2.07500029" "        | 0.492547989        |         |
| 7.67500019" "        | 0.479490995        |         |
| 2.37500024" "        | 0.470099002        |         |
| 0.97500026" "        | 0.468342006        |         |

|               |             |  |
|---------------|-------------|--|
| 1.72500026" " | 0.454252005 |  |
| 1.87500024" " | 0.429001004 |  |
| 1.62500024" " | 0.422419995 |  |
| 2.77500033" " | 0.410780996 |  |
| 0.92500025" " | 0.404621005 |  |
| 1.57500029" " | 0.403654993 |  |
| 7.72500038" " | 0.399958014 |  |
| 8.62500000" " | 0.391770989 |  |
| 2.97500038" " | 0.388238013 |  |
| 1.12500024" " | 0.362291008 |  |
| 1.77500021" " | 0.361378014 |  |
| 7.92500019" " | 0.342976004 |  |
| 6.82500029" " | 0.33495301  |  |
| 8.87500000" " | 0.306769013 |  |
| 0.82500023" " | 0.301243991 |  |
| 6.92500019" " | 0.288818002 |  |
| 8.27500057" " | 0.255508006 |  |
| 0.77500021" " | 0.242476001 |  |
| 8.32500076" " | 0.239109993 |  |
| 0.67500025" " | 0.232228994 |  |
| 0.62500024"   | 0.229100004 |  |
| 2.27500033" " | 0.222666994 |  |
| 6.62500048" " | 0.215443999 |  |
| 8.52500057" " | 0.205983996 |  |
| 6.77500057" " | 0.181765005 |  |
| 8.12500000" " | 0.177134007 |  |
| 8.47500038" " | 0.173688993 |  |
| 8.37500000" " | 0.168236002 |  |
| 7.87500048" " | 0.166931003 |  |
| 6.67500019" " | 0.166602999 |  |
| 9.72500038" " | 0.139479995 |  |
| 8.77500057" " | 0.138460994 |  |
| 6.72500038" " | 0.136855006 |  |
| 6.57500029" " | 0.107058004 |  |
| 9.82500076" " | 0.101692997 |  |
| 9.07500076" " | 0.098023199 |  |
| 8.17500019" " | 0.0966281   |  |
| 6.52500010" " | 0.095339902 |  |
| 9.77500057" " | 0.091663398 |  |
| 9.92500019" " | 0.087485597 |  |
| 9.22500038" " | 0.0857803   |  |
| 9.52500057" " | 0.080743998 |  |
| 9.87500000" " | 0.076461099 |  |
| 9.62500000" " | 0.076252401 |  |
| 8.72500038" " | 0.074013397 |  |
| 9.67500019" " | 0.072376303 |  |

|               |             |  |
|---------------|-------------|--|
| 9.32500076" " | 0.072365902 |  |
| 9.27500057" " | 0.0679399   |  |
| 9.57500076" " | 0.065350302 |  |
| 4.52500010" " | 0.063555896 |  |
| 8.67500019" " | 0.0601914   |  |
| 9.97500038" " | 0.059533998 |  |
| 9.37500000" " | 0.059182301 |  |
| 8.97500038" " | 0.055453699 |  |
| 8.92500019" " | 0.055011801 |  |
| 9.02500057" " | 0.054043699 |  |
| 9.42500019" " | 0.052002799 |  |
| 8.42500019" " | 0.0471517   |  |
| 9.47500038" " | 0.046968799 |  |
| 9.17500019" " | 0.0388784   |  |

### VIP for PLS-DA regarding SPPB after 12 months

| Primary ID (chemical shift) | VIP                | Targeted metabolites |
|-----------------------------|--------------------|----------------------|
| 4.07500029" "               | 3.433180094        |                      |
| <b>3.27500033" "</b>        | <b>3.269949913</b> | TMAO                 |
| 2.17500019" "               | 2.837589979        |                      |
| 7.82500029" "               | 2.326329947        |                      |
| 7.52500057" "               | 2.282910109        |                      |
| 7.17500019" "               | 2.20314002         |                      |
| 7.12500048" "               | 2.202950001        |                      |
| 2.67500019" "               | 2.023780107        |                      |
| 3.22500038" "               | 1.941140056        |                      |
| 8.82500076" "               | 1.932309985        |                      |
| 3.97500038" "               | 1.86135006         |                      |
| 4.42500019" "               | 1.837069988        |                      |
| 3.57500029" "               | 1.817579985        |                      |
| 4.02500010" "               | 1.726169944        |                      |
| 2.87500024" "               | 1.627320051        |                      |
| 3.12500024" "               | 1.618720055        |                      |
| 1.87500024" "               | 1.594799995        |                      |
| <b>7.62500048" "</b>        | <b>1.590489984</b> | Hippuric acid        |
| 3.72500038" "               | 1.562039971        |                      |
| 3.62500024" "               | 1.526039958        |                      |
| 2.52500033" "               | 1.450109959        |                      |
| 7.37500048" "               | 1.435490012        |                      |
| 7.32500029" "               | 1.426010013        |                      |
| 0.87500024" "               | 1.396839976        |                      |
| 9.12500000" "               | 1.360780001        |                      |

|                      |                    |         |
|----------------------|--------------------|---------|
| 4.27500010" "        | 1.336619973        |         |
| 2.57500029" "        | 1.331959963        |         |
| 1.27500021" "        | 1.304810047        |         |
| 1.42500031" "        | 1.197999954        |         |
| 7.57500029" "        | 1.13301003         |         |
| 2.32500029" "        | 1.125509977        |         |
| 2.47500038" "        | 1.118489981        |         |
| 3.07500029" "        | 1.111829996        |         |
| 3.52500033" "        | 1.107740045        |         |
| 3.67500019" "        | 1.063949943        |         |
| 2.42500019" "        | 1.056030035        |         |
| 4.47500038" "        | 1.047000051        |         |
| 2.12500024" "        | 1.034809947        |         |
| 2.02500033" "        | 1.019330025        |         |
| 3.02500033" "        | 0.98951            |         |
| 7.92500019" "        | 0.988188028        |         |
| 3.17500019" "        | 0.972037971        |         |
| <b>1.92500031" "</b> | <b>0.952609003</b> | Acetate |
| 8.57500076" "        | 0.928424001        |         |
| 7.02500057" "        | 0.922134995        |         |
| 3.37500024" "        | 0.917999029        |         |
| 4.32500029" "        | 0.859907985        |         |
| <b>2.22500038" "</b> | <b>0.855675995</b> | Acetone |
| 3.87500024" "        | 0.84246701         |         |
| 3.42500019" "        | 0.837758005        |         |
| 8.07500076" "        | 0.826223016        |         |
| 7.07500029" "        | 0.808574975        |         |
| 4.22500038" "        | 0.801088989        |         |
| 4.17500019" "        | 0.793448985        |         |
| 4.12500048" "        | 0.790503979        |         |
| 3.77500033" "        | 0.757955015        |         |
| 7.27500057" "        | 0.756859004        |         |
| 4.37500048" "        | 0.742093027        |         |
| 1.07500029" "        | 0.730614007        |         |
| 1.37500024" "        | 0.722832024        |         |
| 3.32500029" "        | 0.691488981        |         |
| 6.97500038" "        | 0.690173984        |         |
| 1.17500019" "        | 0.675261974        |         |
| 1.52500021" "        | 0.674032986        |         |
| 1.47500026" "        | 0.658580005        |         |
| 2.97500038" "        | 0.651938975        |         |
| 2.92500019" "        | 0.625930011        |         |
| 2.27500033" "        | 0.623319983        |         |
| 2.77500033" "        | 0.619596004        |         |
| 1.22500026" "        | 0.616451025        |         |
| 7.47500038" "        | 0.615541995        |         |

|                      |                    |         |
|----------------------|--------------------|---------|
| 3.82500029" "        | 0.613763988        |         |
| 1.02500021" "        | 0.604955971        |         |
| <b>1.32500029" "</b> | <b>0.593318999</b> | Lactate |
| 2.37500024" "        | 0.586853981        |         |
| 8.17500019" "        | 0.586709976        |         |
| 6.82500029" "        | 0.584164023        |         |
| <b>7.67500019" "</b> | <b>0.579671979</b> |         |
| 1.72500026" "        | 0.566438973        |         |
| 1.62500024" "        | 0.554705977        |         |
| 2.72500038" "        | 0.550706983        |         |
| 3.92500019" "        | 0.536671996        |         |
| 2.07500029" "        | 0.529794991        |         |
| 1.82500029" "        | 0.528501987        |         |
| 6.62500048" "        | 0.523881972        |         |
| 7.42500019" "        | 0.515685976        |         |
| 6.87500048" "        | 0.5111116028       |         |
| 0.92500025" "        | 0.504585981        |         |
| 1.67500031" "        | 0.488467008        |         |
| 7.77500057" "        | 0.482813001        |         |
| 8.22500038" "        | 0.480168015        |         |
| 7.87500048" "        | 0.473710001        |         |
| 6.92500019" "        | 0.461053014        |         |
| 1.77500021" "        | 0.457747012        |         |
| 8.87500000" "        | 0.457242012        |         |
| 8.47500038" "        | 0.451622993        |         |
| 8.37500000" "        | 0.440632999        |         |
| 1.57500029" "        | 0.417923987        |         |
| 1.97500026" "        | 0.408549011        |         |
| 2.82500029" "        | 0.408241004        |         |
| 6.77500057" "        | 0.390648007        |         |
| 3.47500038" "        | 0.383183002        |         |
| <b>0.97500026" "</b> | <b>0.382909</b>    | Valine  |
| 8.62500000" "        | 0.373353004        |         |
| 6.72500038" "        | 0.365529001        |         |
| 7.22500038" "        | 0.364944994        |         |
| 0.72500026" "        | 0.360915989        |         |
| 8.27500057" "        | 0.356056988        |         |
| 7.72500038" "        | 0.315138996        |         |
| 6.67500019" "        | 0.313432008        |         |
| 8.52500057" "        | 0.304044008        |         |
| 6.57500029" "        | 0.295473993        |         |
| 0.82500023" "        | 0.292849988        |         |
| 7.97500038" "        | 0.291307002        |         |
| 0.67500025" "        | 0.267298013        |         |
| 0.62500024"          | 0.26086399         |         |
| 2.62500024" "        | 0.254456013        |         |

|               |             |  |
|---------------|-------------|--|
| 0.77500021" " | 0.237210006 |  |
| 6.52500010" " | 0.231463999 |  |
| 8.32500076" " | 0.205871001 |  |
| 8.12500000" " | 0.205523998 |  |
| 1.12500024" " | 0.199608997 |  |
| 8.42500019" " | 0.175608993 |  |
| 8.02500057" " | 0.144948006 |  |
| 8.67500019" " | 0.111160003 |  |
| 8.77500057" " | 0.107490003 |  |
| 9.72500038" " | 0.102008    |  |
| 9.02500057" " | 0.090320602 |  |
| 9.07500076" " | 0.077213898 |  |
| 9.82500076" " | 0.076349102 |  |
| 4.52500010" " | 0.075899497 |  |
| 9.77500057" " | 0.070663698 |  |
| 9.92500019" " | 0.061778601 |  |
| 9.27500057" " | 0.061314501 |  |
| 8.97500038" " | 0.058582202 |  |
| 8.72500038" " | 0.0576168   |  |
| 8.92500019" " | 0.054319501 |  |
| 9.52500057" " | 0.050620198 |  |
| 9.17500019" " | 0.047325801 |  |
| 9.97500038" " | 0.046857402 |  |
| 9.87500000" " | 0.046033502 |  |
| 9.22500038" " | 0.045117699 |  |
| 9.32500076" " | 0.043583799 |  |
| 9.67500019" " | 0.043511599 |  |
| 9.42500019" " | 0.036835201 |  |
| 9.47500038" " | 0.036793798 |  |
| 9.37500000" " | 0.0359479   |  |
| 9.57500076" " | 0.033355899 |  |
| 9.62500000" " | 0.033151899 |  |
